# Supplementary material
Source: PubMed Central journal article supplement (PMC2685627)
Supplement: tpc.107.055228_1.pdf [file tpc.107.055228_1.pdf]

Supplemental Data: Mosquera et al. (2009). Interaction transcriptome analysis identifies *Magnaporthe oryzae* BAS1-4 as biotrophy-associated secreted proteins in rice blast disease.

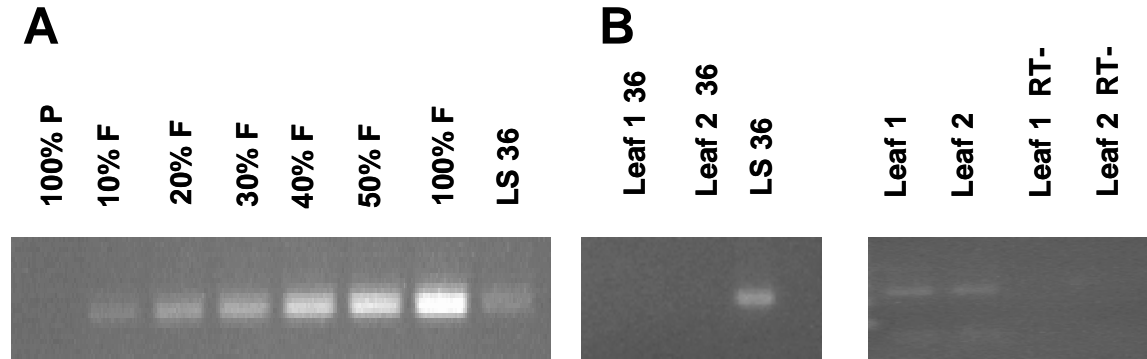

**Supplemental Figure 1. RT-PCR experiments to assess fungal RNA content in infected tissue samples and to confirm invasion-specific expression of fungal and rice genes.**

**(A) Relative RT-PCR amplification of fungal actin in 36 hpi infected sheath tissue and control mixtures.** RNA mixtures were obtained by combining defined amounts of RNA from fungal mycelium and mock-inoculated sheath. Percentage values (%F) correspond to the fungal RNA content. 100%P is pure plant RNA, and LS36 = RNA from infected leaf sheaths at 36 hpi. For each, 22 cycles of amplification were used.

**(B) RT-PCR amplification of fungal actin in infected sheaths and leaves at 36 hpi.** A prominent fungal actin band was seen from infected sheath RNAs after 28 cycles, but not from the infected leaf samples. After 35 cycles, faint bands were seen in the infected leaf samples, but not in controls that lacked reverse transcriptase (RT-). For infected leaf tissue, whole plants were inoculated. Samples were collected separately for the most susceptible leaf 1 (the half-extended youngest leaf at the time of inoculation), and the lesser susceptible leaf 2 (the next youngest leaf, fully extended at the time of inoculation). LS36 = Leaf sheath; Leaf 1= youngest leaf; Leaf 2 = older leaf.

C

## Up-Regulated Fungal Genes

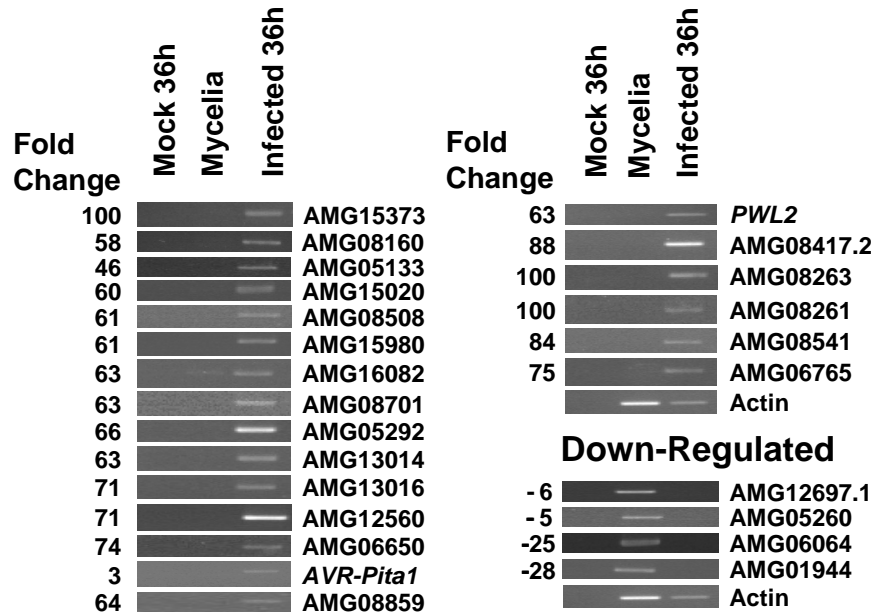

## Supplemental Figure 1, continued.

**(C) Confirmation of invasion-specific expression of fungal genes by RT-PCR.** Twenty IH-enriched genes, including *PWL2*, *BAS1* (AMG08261), *BAS2* (AMG08541), *BAS3* (AMG12560), and *BAS4* (AMG15980) with expression levels >50-fold higher in IH were amplified from infected rice, but not from the mock-inoculated rice or mycelial samples. Four genes with higher expression levels in mycelium, a clock-controlled gene-9 homolog from *Neurospora crassa* (AMG12697.1), the G-protein coupled receptor *PTH11* (AMG05260), and the melanin biosynthesis genes scytalone reductase (AMG06064) and tetrahydroxynaphthalene reductase (AMG01944), were amplified only from mycelial RNAs. For this analysis, the RNAs (left to right) were from mock-inoculated sheath at 36 hpi (Mock 36h), from mycelium (Mycelia), and from infected sheath at 36 hpi (Infected 36h). A standard 27 rounds of PCR amplification were used for each primer pair. No amplification was seen from the Mock 36 hpi negative control. Amplification of the fungal actin gene control reflects the lower amount of fungal RNA in the infected tissue (20%) compared to mycelial RNA, resulting in increased significance for differential amplification of up-regulated genes. One predicted gene had two possible transcripts, AMG08417.1 and AMG08417.2, and primers designed to differentiate these transcripts showed AMG08417.2 was correct.

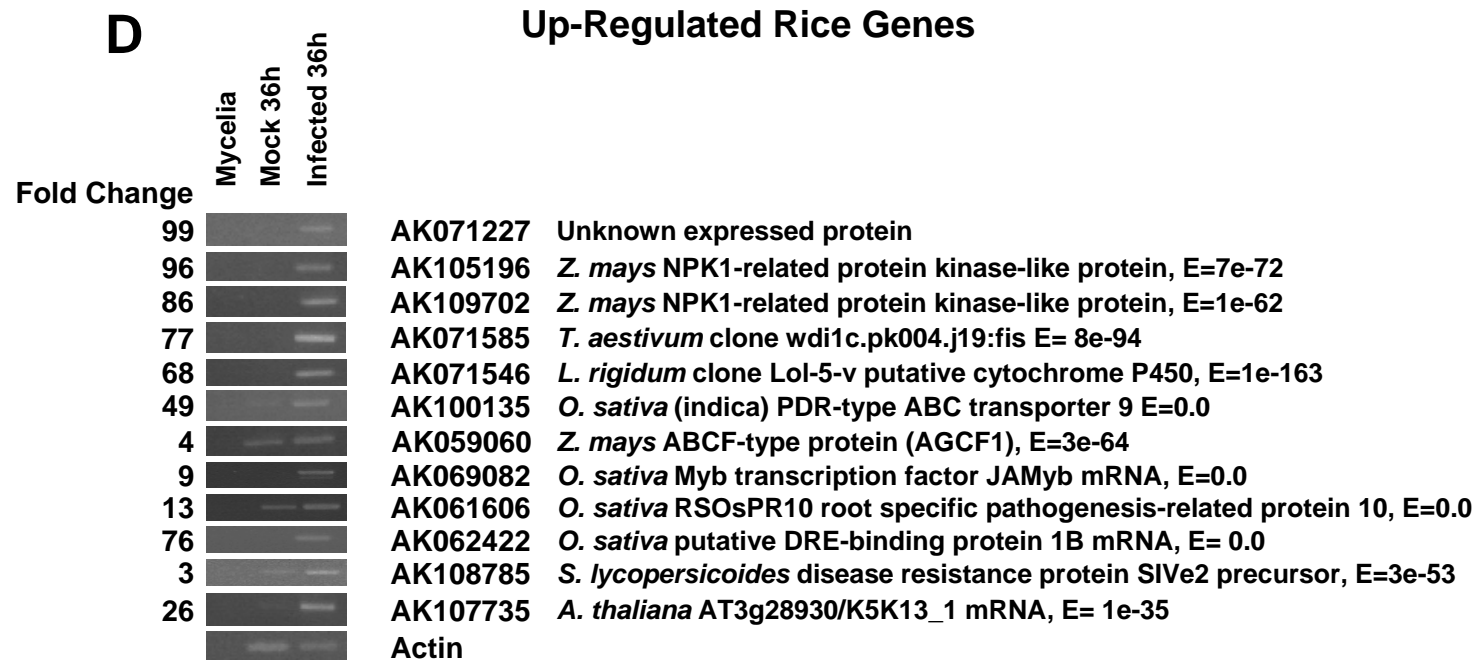

**Supplemental Figure 1, continued**

**(D) Confirmation of invasion-specific expression of rice genes by RT-PCR.** Using the same RNA samples as in (C), gene-specific fragments for rice genes expressed  $\geq 26$ -fold higher during infection were amplified from infected but not mock-inoculated rice. Genes with differential expression ratios from 3 and 13 sometimes amplified from both. For rice gene analysis, RNAs (left to right) were from mycelium (Mycelia), mock-inoculated sheath at 36 hpi (Mock 36h), and from infected sheath at 36 hpi (Infected 36h). For each, 27 rounds of PCR amplification were used. No amplification was seen from the negative control mycelial RNA. Primers for the rice actin gene were used as controls. Gene-specific fragments for eight rice genes expressed  $\geq 26$ -fold higher during infection were amplified from infected but not mock-inoculated rice. Although a gene with 10-fold higher expression was only amplified from infected tissue, genes with 4-, 13-, and 3-fold up-regulation were amplified from both infected and mock-inoculated tissues.

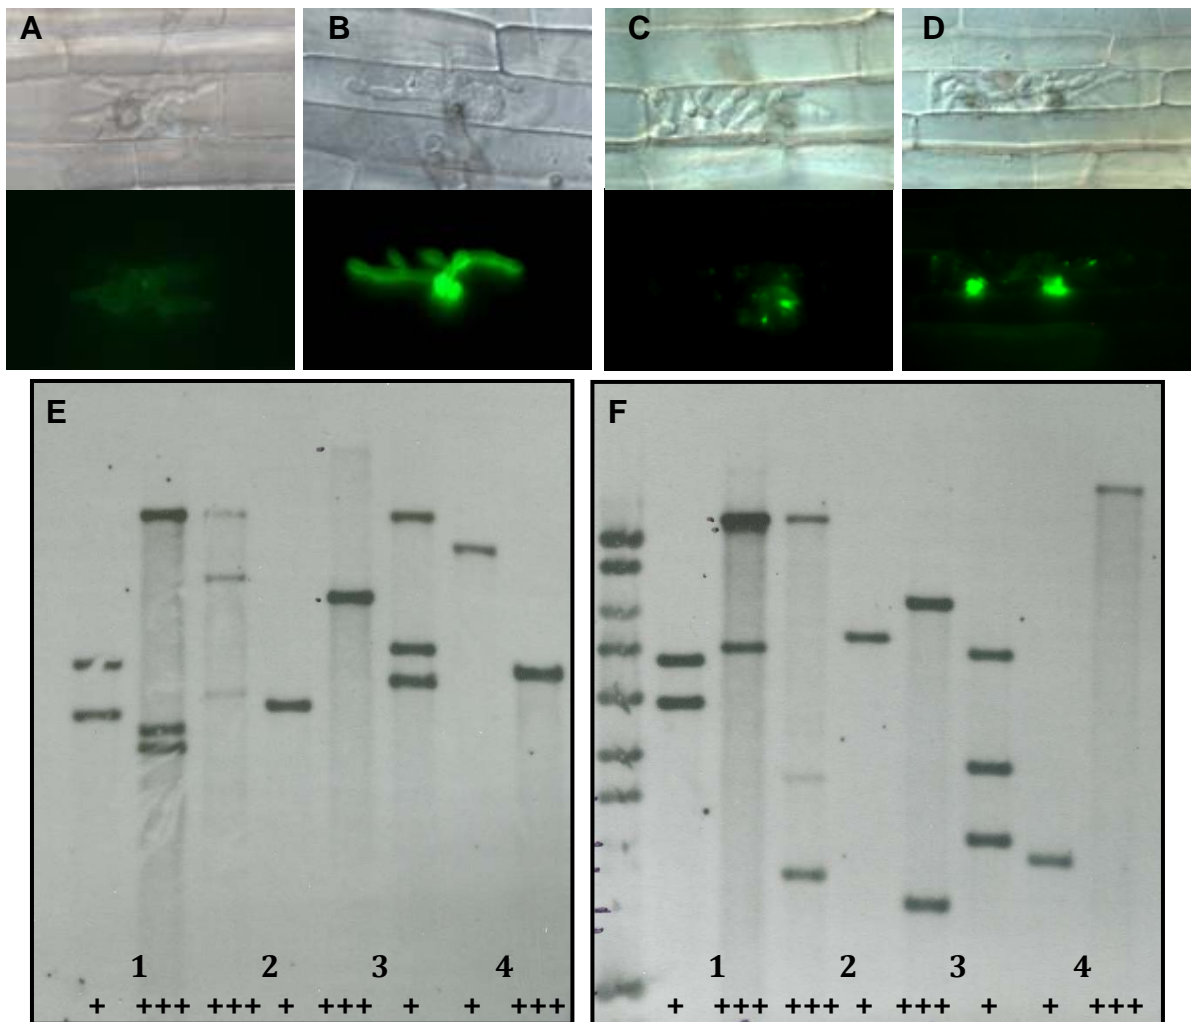

**Supplemental Figure 2. Fluorescence expression patterns are conserved for independent fungal transformants expressing putative BAS:YFP proteins, although fluorescence intensities vary due to position effects.**

For each gene, the 1-kb promoter and coding sequence was cloned with a C-terminal fusion of YFP. For each, 10 independent transformants were observed during invasion of sheath epidermal cells. Images: DIC (top) and YFP (bottom). For comparison, excitation exposure time was standardized at 2 seconds.

**(A)** and **(B)** Variation between two independent fungal transformants with **BAS4:YFP**, showing the lowest (+) and the strongest (+++).

**(C)** and **(D)** Variation between two independent fungal transformants of **BAS3:YFP**, showing the lowest (+) and the strongest (+++).

**(E)** and **(F)** Southern hybridization analysis was performed with the least (+) and the strongest (+++) fluorescent transformants of **(1) BAS1, (2) BAS2, (3) BAS3** and **(4) BAS4**. The analysis used restriction enzymes EcoRI (E) and BamHI (F), and YFP as a probe. This analysis suggested that the intensity did not depend on copy number, but on position effect instead. Since fluorescence patterns were consistent for each gene, we worked with transformants with the strongest fluorescence.

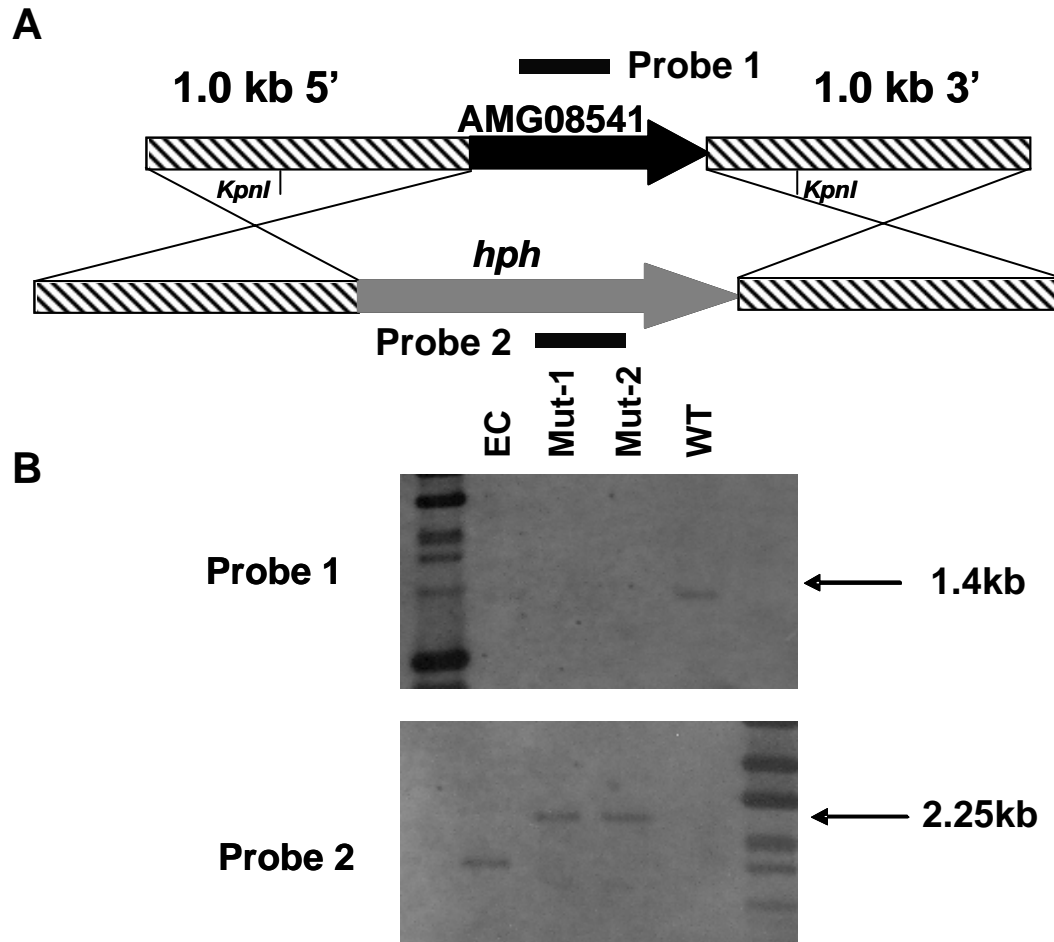

### Supplemental Figure 3. Gene Replacement Analysis of *BAS2*.

The same methods were used for gene knock-out analyses of the other genes.

**(A)** Schematic diagram of the MGG\_09693.6 (black arrow) genomic locus. The gene replacement construct contained the *hph* gene (gray arrow) flanked by ~1000-bp of sequences up-stream and down-stream from the coding sequence.

**(B)** Southern hybridization analysis was performed using genomic DNAs from an ectopic transformant (EC, KV56), two independent knock-out mutants, Mut-1 (KV54) and Mut-2 (KV55), and the wild-type strain KV1 (WT). *Kpn*I-digested genomic DNAs were separated by electrophoresis in an 0.8% agarose gel. Probe 1 (wild-type coding sequence) hybridized to the expected 1.4-kb fragment in the wild type strain and ectopic transformant, but not in the mutants. Probe 2 (*hph* coding sequence) hybridized with DNAs from the ectopic transformant and the mutants, but not from wild-type.

**Supplemental Table 1A.** Properties of the 50-most down-regulated genes in IH; most have been previously identified as expressed by fungal cell types *in vitro*.

| Probe      | Fold change       | Putative identity <sup>a</sup>                       | Signal Peptide | EST / SAGE <sup>c</sup>          |
|------------|-------------------|------------------------------------------------------|----------------|----------------------------------|
| AMG06063.1 | -83<br>(0)        | Hypothetical protein <sup>b</sup>                    |                | cs, cw, my                       |
| AMG13759.1 | -77<br>(0)        | Hypothetical protein                                 |                | cm, MG_SGa                       |
| AMG06063.2 | -60<br>(2.14E-40) | Hypothetical protein <sup>b</sup>                    |                | cs, cw, my                       |
| AMG11634.1 | -55<br>(0)        | Hypothetical protein <sup>b</sup>                    |                | cs, mk, mt,<br>MG_SGa            |
| AMG09784.1 | -54<br>(2.91E-41) | Hypothetical protein                                 |                | ap, cs, mt, ns                   |
| AMG00941.1 | -46<br>(0)        | Copper radical oxidase<br>[Q0ZKA5_PHACH, E = 0.0]    |                | mt, ns, su,<br>MG_SGa,<br>OSJNGg |
| AMG14000.1 | -43<br>(0)        | UVI-1, Near-UV induced<br>[Q9P338_9PLEO, 2e-65]      | SP             | ap cs mk mt ns<br>su             |
| AMG15966   | -39<br>(0)        | Short chain dehydrogenase<br>[Q4W9L2_ASPFU, 1e-36]   |                | cm, mt,<br>MG_SGa                |
| AMG09317   | -39<br>(0)        | Hypothetical protein, no<br>Broad hit in version 5   |                | cm, cs, cw                       |
| AMG01344.2 | -38<br>(0)        | Hypothetical protein <sup>b</sup>                    |                | cw, MG_SGa,<br>OSJNGg            |
| AMG12371.1 | -38<br>(5.76E-22) | Hypothetical protein <sup>b</sup>                    |                | -                                |
| AMG09954   | -38<br>(0)        | amdA-like protein<br>[A2QBB3_ASPNG, 3e-62]           |                | cs, cw,<br>MG_SGa                |
| AMG08367   | -37<br>(0)        | Aminotransferase<br>(A1DHN5_NEOFI, 1e-91)            |                | mk, mt,<br>MG_SGa,<br>OSJNGg     |
| AMG04896.2 | -37<br>(0)        | LysM Domain Protein<br>(A1DKY1_NEOFI, 9e-32)         | SP             | my, ns                           |
| AMG01490   | -37<br>(0)        | Hypothetical protein, No<br>Broad hit in version 5   |                | cm, ns                           |
| AMG01344.1 | -36<br>(0)        | F-box domain protein<br>(A1DH69_NEOFI, 6e-39)        |                | cw, su, my,<br>MG_SGa            |
| AMG10496   | -36<br>(0)        | Metalloprotease 1 precursor<br>[Q71H76_COCP0, 4e-32] | SP             | cm                               |
| AMG05375   | -35<br>(0)        | Hypothetical protein                                 |                | cm                               |
| AMG07022   | -34<br>(0)        | Hypothetical protein                                 |                | -                                |

|            |                   |                                                                     |    |                                              |
|------------|-------------------|---------------------------------------------------------------------|----|----------------------------------------------|
| AMG05270   | -34<br>(0)        | Hypothetical protein<br>(Interpro: Major intrinsic protein)         |    | cm, cs, cw, mt,<br>my, ns, su,<br>MG_SGa     |
| AMG04953   | -34<br>(2.09E-34) | dicarboxylic amino acid permease [Q0C9B3_ASPTN, 1e-120]             |    | cm, cw, mt,<br>MG_SGa                        |
| AMG10872   | -33<br>(0)        | AAA-family ATPase [A1DD11_NEOFI, 3e-147]                            |    | cs, ns,<br>MG_SGa,<br>OSJNGg                 |
| AMG14477   | -33<br>(0)        | Hypothetical protein                                                | SP | ns, MG_SGa                                   |
| AMG13759.2 | -33<br>(0)        | Hypothetical protein                                                |    | cw                                           |
| AMG07762   | -32<br>(0)        | Hypothetical protein                                                |    | cm, cs, cw,<br>MG_SGa                        |
| AMG11366   | -31<br>(3.54E-16) | ThiJ/Pfpl family protein [Q4WW31_ASPFU, 2e-34]                      |    | cm, MG_SGa,<br>OSJNGg                        |
| AMG12878.2 | -31<br>(0)        | Hypothetical protein                                                |    | cm, su, ns,<br>MG_SGa                        |
| AMG01944   | -28<br>(0)        | Tetrahydroxynaphthalene Reductase [ <i>M. oryzae</i> ; E-value = 0] |    | mk, cm,<br>MG_SGa,<br>OSJNGg                 |
| AMG04981   | -28<br>(0)        | cytochrome P450 monooxygenase [A4RAE7_MAGGR, E=0.0]                 |    | cm, ns, su                                   |
| AMG05178   | -28<br>(4.13E-07) | DnaJ domain protein [Q4WY25_ASPFU, 1e-20]                           |    | cm                                           |
| AMG05092.2 | -27<br>(0)        | Hypothetical protein                                                |    | cm                                           |
| AMG13068.2 | -27<br>(0)        | Hypothetical protein                                                |    | ns                                           |
| AMG06334   | -27<br>(1.74E-31) | IgE-binding protein [O74263_ASPFU, 1e-22]                           | SP | cm, cw                                       |
| AMG06993.1 | -26<br>(0)        | Hypothetical protein                                                |    | MG_SGa                                       |
| AMG06707   | -26<br>(0)        | Dipeptidyl-peptidase [A1DGJ8_NEOFI, E = 0]                          | SP | ns, su                                       |
| AMG01829.1 | -25<br>(8.91E-34) | Hypothetical protein                                                |    | cm, cw, my, ns,<br>MG_SGa                    |
| AMG02948   | -25<br>(1.19E-21) | BUF1, trihydroxynaphthalene reductase                               |    | ap, cm, cs, cw,<br>mk, mt, ns, su,<br>MG_SGa |
| AMG08668.3 | -25<br>(0)        | Hypothetical protein                                                |    | -                                            |
| AMG06064   | -25<br>(1.39E-37) | RSY1, scytalone dehydratase (EC 4.2.1.94) - <i>M. oryzae</i>        |    | ap, cm, mt, ns,<br>su                        |

|            |                   |                                                            |    |                                             |
|------------|-------------------|------------------------------------------------------------|----|---------------------------------------------|
| AMG00656   | -24<br>(5.82E-41) | Hypothetical protein                                       |    | cm, cw, mk,<br>mt, su,<br>MG_SGa,<br>OSJNGg |
| AMG02248   | -24<br>(0)        | Hypothetical protein                                       |    | -                                           |
| AMG07563   | -24<br>(1.64E-10) | NF-X1 finger transcription factor [A1DCD3_NEOFI, E= 2e-46] |    | MG_SGa                                      |
| AMG14788   | -24<br>(0)        | AAA family of ATPase [A2QW59_ASPNG, 9e-127]                |    | ns, MG_SGa                                  |
| AMG06740   | -24<br>(5.06E-42) | Hypothetical protein                                       |    | mt                                          |
| AMG06595   | -24<br>(0)        | Hypothetical protein                                       |    | cm, cw, mt, my                              |
| AMG11066   | -24<br>(0)        | Fungal-specific transcription factor [O14130_SCHPO, 1e-25] |    | -                                           |
| AMG07092   | -24<br>(0)        | Hypothetical protein                                       |    | -                                           |
| AMG06010   | -23<br>(0)        | Hypothetical protein (Interpro: Amidase signature enzyme)  |    | -                                           |
| AMG01617   | -23<br>(0)        | Beta-1, 3 exoglucanase [Q9HE44_NEUCR, E= 0.0]              | SP | -                                           |
| AMG04610.2 | -22<br>(0)        | Hypothetical protein                                       |    | cm, cw,<br>MG_SGa                           |

<sup>a</sup>Unless stated otherwise, putative functions are indicated by the UniprotKB/TrEMBL ID (<http://us.expasy.org/>), with corresponding e-value, for the best Uniprot blast match (<http://www.mgosdb.org>)

<sup>b</sup>This predicted gene was deleted from *M. oryzae* genome version 5.

<sup>c</sup>Library abbreviations: ap = appressoria, cm = mycelium from complete medium, cs = conidiospores, cw = mycelium grown on rice cell walls, mk = *pmk1*<sup>-</sup> mutant, mt = mating culture, my = mycelium from minimal medium, ns = nitrogen-starved mycelium, and su = subtracted library (Ebbole et al., 2004). SAGE library abbreviations: MG\_SGa = mycelium from minimal medium, OSJNGg = compatible interaction at 96 hpi (Gowda et al, 2006).



**Supplemental Table 1B.** Putative secreted proteins with 10-fold and higher differential expression levels in IH compared to mycelium.

| <b>Probe (MGOS name<sup>a</sup>)</b> | <b>Fold change (P-value)</b> | <b>Putative identity<sup>b</sup> and chromosome location</b>             | <b>EST / SAGE<sup>c</sup></b> |
|--------------------------------------|------------------------------|--------------------------------------------------------------------------|-------------------------------|
| AMG08263                             | 100<br>(0)                   | Hypothetical protein, Chr. IV                                            | -                             |
| AMG08261                             | 100<br>(0)                   | BAS1, Hypothetical protein, Chr. IV                                      | -                             |
| AMG08417.2                           | 88<br>(0)                    | Hypothetical protein, Chr. IV                                            | -                             |
| AMG08541                             | 84<br>(0)                    | BAS2, Hypothetical protein, Chr. V                                       | -                             |
| AMG06765                             | 75<br>(0)                    | Hypothetical protein, Chr. III                                           | -                             |
| AMG06650                             | 74<br>(0)                    | Hypothetical protein, Chr. III                                           | -                             |
| AMG12560                             | 71<br>(0)                    | BAS3, Hypothetical protein, Chr. IV                                      | -                             |
| AMG07384                             | 71<br>(0)                    | Hypothetical protein, Chr. IV                                            | -                             |
| AMG08859                             | 64<br>(0)                    | Hypothetical protein, Chr. V                                             | -                             |
| AMG13014                             | 63<br>(0)                    | Hypothetical protein, Chr. VI                                            | -                             |
| AMG11184                             | 63<br>(0)                    | PWL2 protein [NCBI AAA91019 <i>M. oryzae</i> , E = 0.0], Chr. IV and III | -                             |
| AMG15980                             | 61<br>(0)                    | BAS4, Hypothetical protein, Chr. VI                                      | -                             |
| AMG08160                             | 58<br>(0)                    | Endochitinase [Q9C199_ANAMU, E = 2e-75], Chr. IV                         | MG_SGa,<br>OSJNGg             |
| AMG08787                             | 57<br>(0)                    | Hypothetical protein (eliminated from Genome assembly 6)                 | -                             |
| AMG08432                             | 51<br>(0)                    | Hypothetical protein, Chr. IV                                            | -                             |
| AMG14799                             | 49<br>(0)                    | Cytosine methyltransferase [Q8NJV9_NEUIN;E = 9e-89]                      | MG_SGa                        |
| AMG16216                             | 48<br>(0)                    | Hypothetical protein                                                     | -                             |
| AMG05133                             | 46<br>(0)                    | Multicopper oxidase [Q2UV32_ASPOR, E = 0.0]                              | -                             |
| AMG03019                             | 43<br>(0)                    | Hypothetical protein                                                     | -                             |
| AMG02875                             | 38<br>(0)                    | Aspartic proteinase precursor (Q00895_COLGL, e=3e-66)                    | -                             |
| AMG13593.2                           | 36                           | Hypothetical protein                                                     | cw                            |

|            |                  |                                                           |                   |
|------------|------------------|-----------------------------------------------------------|-------------------|
|            | (0)              |                                                           |                   |
| AMG13918   | 36<br>(2.7E-24)  | Hypothetical protein                                      | -                 |
| AMG02533   | 36<br>(1.29E-29) | Hypothetical protein                                      | -                 |
| AMG05132   | 35<br>(0)        | Hypothetical protein                                      | -                 |
| AMG15524   | 33<br>(0)        | Hypothetical protein                                      | -                 |
| AMG07601.1 | 30<br>(0)        | Hypothetical protein                                      | cm                |
| AMG12804   | 29<br>(0)        | Hypothetical protein                                      |                   |
| AMG02457   | 28<br>(0)        | Acetylcholinesterase<br>[Q2TZ03 ASPOR, 3e-93]             | -                 |
| AMG13251   | 28<br>(0)        | Hypothetical protein                                      | -                 |
| AMG01557   | 28<br>(0)        | Hypothetical protein                                      | -                 |
| AMG02692   | 27<br>(0)        | Hypothetical protein                                      | -                 |
| AMG03089   | 27<br>(0)        | Hypothetical protein                                      | my, mt,<br>MG SGa |
| AMG07577   | 25<br>(0)        | Hypothetical protein                                      | -                 |
| AMG06843   | 22<br>(0)        | Hypothetical protein                                      | -                 |
| AMG11086   | 22<br>(0)        | Hypothetical protein                                      | -                 |
| AMG08195   | 21<br>(1.01E-41) | Hypothetical protein                                      | su                |
| AMG09820   | 20<br>(0)        | Hypothetical protein                                      | -                 |
| AMG07137   | 20<br>(0)        | Hypothetical protein                                      | -                 |
| AMG12553   | 19<br>(0)        | Subtilisin-like serine protease;<br>[Q8X1Y7 METAN; 6e-74] | -                 |
| AMG15040   | 18<br>(0)        | Hypothetical protein                                      | -                 |
| AMG04878   | 17<br>(0)        | Cellulase CelA [A1DF29 NEOFI,<br>1e-61]                   | -                 |
| AMG13227   | 17<br>(0)        | Hypothetical protein                                      | -                 |
| AMG02455   | 16<br>(2.45E-12) | Hypothetical protein                                      | -                 |
| AMG13025   | 15               | Hypothetical protein                                      | -                 |

|            |                  |                                                            |    |
|------------|------------------|------------------------------------------------------------|----|
|            | (5.7E-35)        |                                                            |    |
| AMG07056   | 15<br>(0)        | Hypothetical protein                                       | -  |
| AMG02439   | 15<br>(5.1E-23)  | Hypothetical protein                                       | -  |
| AMG06036   | 14<br>(0)        | Endonuclease/Exonuclease/Phosphatase [Q4WZ13_ASPFU, 3e-43] | -  |
| AMG08482   | 14<br>(3.41E-28) | Hypothetical protein                                       | -  |
| AMG02914   | 13<br>(3.39E-30) | Hypothetical protein                                       | -  |
| AMG12924   | 13<br>(0)        | Hypothetical protein                                       | -  |
| AMG02925   | 13<br>(0)        | Hypothetical protein                                       | -  |
| AMG13855   | 13<br>(8.01E-41) | Hypothetical protein                                       | -  |
| AMG00035   | 13<br>(1.40E-45) | Hypothetical protein                                       | -  |
| AMG07561   | 13<br>(0)        | Hypothetical protein                                       | cm |
| AMG02702   | 12<br>(0)        | Hypothetical protein                                       | -  |
| AMG04075   | 11<br>(3.71E-42) | Hypothetical protein                                       | -  |
| AMG08865   | 10<br>(0)        | Hypothetical protein                                       | -  |
| AMG08416.1 | 10<br>(0)        | Hypothetical protein                                       | ns |
| AMG06620   | 10<br>(2.60E-29) | Hypothetical protein                                       | -  |

<sup>a</sup>MGOS gene names correspond to the probes used in version 2 of the Agilent *M. oryzae* microarray. They will not change with new releases of the genome sequence. MGOS names can be converted to Broad Database gene names at [www.mgosdb.org](http://www.mgosdb.org).

<sup>b</sup>Unless stated otherwise, putative functions are indicated by the UniprotKB/TrEMBL ID (<http://us.expasy.org/>), with corresponding e-value, for the best Uniprot blast match (<http://www.mgosdb.org>)

<sup>c</sup>“-“ indicates no EST or SAGE hits. Hits are labeled according to the library in which they occurred. EST library abbreviations: ap = appressoria, cm = mycelium from

complete medium, cs = conidiospores, cw = mycelium grown on rice cell walls, mk = *pmkI*<sup>-</sup> mutant, mt = mating culture, my = mycelium from minimal medium, ns = nitrogen-starved mycelium, and su = subtracted library (Ebbole et al., 2004). SAGE library abbreviations: MG\_SGa = mycelium from minimal medium, OSJNGg = compatible interaction at 96 hpi (Gowda et al, 2006).

**Supplemental Table 1C.** Expression levels of characterized *M. oryzae* pathogenicity genes in IH relative to mycelium.

| Probe      | Fold Change (P-value)               | Gene Identity                                                  | E-value, NCBI Accession # | Role <sup>b</sup> |
|------------|-------------------------------------|----------------------------------------------------------------|---------------------------|-------------------|
| AMG04255   | <b>3</b><br>(4.8E-04)               | <i>ACII</i> , MAC1 (adenylate cyclase)-interacting protein 1   | 4e-45,<br>AY166602        | C, A              |
| AMG05982   | <b>2<sup>a</sup></b><br>(5.0E-09)   | <i>MST12</i> , transcription factor downstream of <i>PMKI</i>  | 7e-37,<br>AF432913        | P, INF            |
| AMG02428   | <b>2</b><br>(0.08)                  | <i>ACE1</i> , Appressorium-specific PK-NRPS enzyme             | 0.0, AJ704622             | AVR               |
| AMG03578.1 | <b>2</b><br>(0.004)                 | <i>CALM</i> , Calmodulin                                       | 7e-74,<br>AF103729        | A                 |
| AMG06876   | <b>2</b><br>(5.6E-04)               | <i>NTH1 (PTH9)</i> , neutral trehalase                         | 0.0,<br>AAN46743          | INF               |
| AMG14183   | <b>2</b><br>(0.086)                 | <i>MgAPT2</i> , P-type ATPase                                  | 0.0,<br>XM_366691         | INF               |
| AMG10289   | <b>1</b><br>(0.025)                 | <i>SPMI</i> , vacuolar subtilisin-like serine proteinase       | 0.0,<br>AB070268          | C, A, INF         |
| AMG07015   | <b>1</b><br>(0.1)                   | <i>PMKI</i> , pathogenicity MAP kinase                         | 0.0,<br>U70134            | A, INF            |
| AMG12418.1 | <b>1</b><br>(0.47)                  | <i>MAGB</i> , G $\alpha$ subunit of a heterotrimeric G protein | 1e-98,<br>AF011341        | A                 |
| AMG06279   | <b>1</b><br>(0.73)                  | <i>MGB1</i> , G $\beta$ subunit of a heterotrimeric G protein  | 0.0,<br>AB086901          | C, A, P           |
| AMG08776   | <b>1</b><br>(0.75)                  | <i>ABC1</i> , ATP-driven efflux pump protein                   | 0.0,<br>AF032443          | INF               |
| AMG08216   | <b>-1</b><br>(0.61)                 | <i>ABC3</i> , MDR efflux pump                                  | 0.0<br>DQ156556           | P                 |
| AMG05260   | <b>-5<sup>a</sup></b><br>(1.3E-08)  | <i>PTH11</i> , integral membrane protein AF119670              | 0.0,<br>AF119670          | A                 |
| AMG06174   | <b>-21<sup>a</sup></b><br>(0.0)     | <i>AOX</i> , alternative oxidase                               | 1e-66,<br>AB005144        | INF?              |
| AMG14765   | <b>-22<sup>a</sup></b><br>(3.1E-40) | <i>MPG1</i> , hydrophobin                                      | 6e-54,<br>L20685          | A                 |
| AMG06064   | <b>-25<sup>a</sup></b><br>(1.4E-37) | <i>RSY1</i> , scytalone dehydratase                            | 0.0,<br>AB004741          | P                 |
| AMG02948   | <b>-25<sup>a</sup></b><br>(1.2E-21) | <i>BUF1</i> , trihydroxynaphthlene reductase                   | 0.0,<br>AY846878          | P                 |
| AMG01944   | <b>-28<sup>a</sup></b><br>(0.0)     | <i>4HNR</i> , tetrahydroxy-naphthalene reductase               | 0.0,<br>XM_365550         | P                 |

<sup>a</sup>P-value still significant after Bonferroni correction.

<sup>b</sup>Pathogenicity trait affected: C=conidiation, A=appressorium formation, P=penetration, INF=infectious growth (usually defined as inability to infect wounded tissue), AVR=avirulence activity in rice with corresponding *R* gene

**Supplemental Table 2: Rice gene categories with members that were up- or down-regulated >3-fold in rice tissue undergoing biotrophic invasion.**

| Gene Id                             | Fold change | Best Homology (E-value)                                                                                       | Comments                                                                        |
|-------------------------------------|-------------|---------------------------------------------------------------------------------------------------------------|---------------------------------------------------------------------------------|
| <b>WRKY</b>                         |             |                                                                                                               |                                                                                 |
| AK106282                            | 19          | <i>Oryza sativa</i> (indica cultivar-group) transcription factor WRKY09 (WRKY09) mRNA, complete cds (5.0E-80) |                                                                                 |
| AK102093                            | 12          | <i>O. sativa</i> (indica cultivar-group) WRKY DNA-binding protein (WRKY89) mRNA, complete cds (1.0E-121).     |                                                                                 |
| AK066255                            | 11          | <i>O. sativa</i> (japonica cultivar-group) WRKY45 mRNA, complete cds (0.0).                                   |                                                                                 |
| AK108860                            | 10          | <i>Solanum tuberosum</i> StWRKY mRNA for WRKY-type DNA binding protein, complete cds (5.0E-42).               |                                                                                 |
| AK108555                            | 8           | <i>Arabidopsis thaliana</i> WRKY transcription factor 51 (WRKY51) mRNA, complete cds (8.0E-29)                |                                                                                 |
| AK065265                            | 5           | <i>O. sativa</i> (indica cultivar-group) transcription factor WRKY31 mRNA, complete cds (1.0E-164).           |                                                                                 |
| AK101653                            | 4           | <i>A. thaliana</i> putative WRKY-type DNA binding protein (At2g46400) mRNA, complete cds (5.0E-14).           |                                                                                 |
| AK108389                            | 3           | <i>O. sativa</i> (indica cultivar-group) transcription factor WRKY08 mRNA, complete cds (2.0E-50).            |                                                                                 |
| AK109568                            | 3           | <i>O. sativa</i> (japonica cultivar-group) WRKY17 mRNA, complete cds (0.0).                                   |                                                                                 |
| AK107199                            | 3           | <i>O. sativa</i> (japonica cultivar-group) WRKY24 mRNA, complete cds (0.0).                                   |                                                                                 |
| <b>Defense / Resistance Related</b> |             |                                                                                                               |                                                                                 |
| <b>AK100135*</b>                    | 49<br>(0)   | <i>O. sativa</i> PDR-type ABC transporter                                                                     | Regulated by abiotic stress in rice roots (Moons et al 2003 FEBS Lett. 553:370) |
| AK063248                            | 28          | <i>Hordeum vulgare</i> HvPR-1a mRNA for a basic PR-1-type pathogenesis-related protein (2.0E-34).             |                                                                                 |
| AK060005                            | 14          | <i>H. vulgare</i> HvPR-1a mRNA for a basic PR-1-type pathogenesis-related protein (1.0E-32)                   |                                                                                 |

|                    |                 |                                                                                                                   |                                                                                                   |
|--------------------|-----------------|-------------------------------------------------------------------------------------------------------------------|---------------------------------------------------------------------------------------------------|
| AK066825           | 14              | <i>O. sativa</i> lipoxygenase (CM-LOX2) mRNA, partial cds (0.0).                                                  |                                                                                                   |
| AK061606           | 13<br>(0)       | <i>O. sativa</i> (japonica cultivar-group) RSOsPR10 mRNA for root specific pathogenesis-related protein 10 (0.0). |                                                                                                   |
| AK105311           | 12              | Pleiotropic drug resistance-like protein                                                                          | Homology to NtPDR, an elicitor-responsive gene in tobacco (Sasabe et al. 2002 FEBS Lett. 518:164) |
| AK101439           | 8               | <i>H. vulgare</i> mRNA for NBS-LRR disease resistance protein homologue (rga S-9202 gene) (1.0E-51).              |                                                                                                   |
| AK064985           | 6               | <i>A. thaliana</i> RPT2 (RPT2) mRNA, complete cds (1.0E-100).                                                     |                                                                                                   |
| AK060057           | 5               | <i>O. sativa</i> (japonica cultivar-group) Prb1 mRNA, complete cds (0.0).                                         |                                                                                                   |
| AK111104           | 5<br>(0)        | <i>Arabidopsis thaliana</i> putative thaumatin (At4g38660) mRNA, complete cds. PLN                                | Only 2 out of 6 thaumatin-like genes were differentially regulated at the $\geq 3$ -fold          |
| AK099946           | 4<br>(8.69E-09) | <i>O. sativa</i> mRNA for thaumatin-like protein. PLN                                                             | 2 <sup>nd</sup> thaumatin-like gene                                                               |
| AK101496           | 3               | <i>H. vulgare</i> partial mRNA for NBS-LRR disease resistance protein (rga S-9203 gene) (7E-90).                  |                                                                                                   |
| AK073881           | 3               | <i>Prunus persica</i> put. NBS-LRR type disease resistance protein (RPM1) mRNA, complete cds (2E-47).             |                                                                                                   |
| AK108785           | 3<br>(5.8E-4)   | <i>Solanum lycopersicoides</i> disease resistance protein SIVe2 precursor, mRNA, complete cds (3.0E-53).          |                                                                                                   |
| AK111610           | -3              | resistance to <i>Pseudomonas syringae</i> protein 5 [imported] - <i>A. thaliana</i> (2.0E-86).                    |                                                                                                   |
| <b>Peroxidases</b> |                 |                                                                                                                   |                                                                                                   |
| AK102307           | 14              | <i>O. sativa</i> cationic peroxidase (OsCPX1) mRNA, complete cds (0.0).                                           |                                                                                                   |
| AK104277           | 13              | <i>H. vulgare</i> peroxidase BP 1 (Prx5) mRNA, complete cds (6.0E-99).                                            |                                                                                                   |
| AK072761           | 9               | <i>Gossypium hirsutum</i> bacterial-induced peroxidase mRNA, complete cds (1.0E-62).                              |                                                                                                   |
| AK064918           | 9               | <i>A. thaliana</i> mRNA for peroxidase ATP22a (1.0E-84).                                                          |                                                                                                   |
| AK109480           | 9               | <i>H. vulgare</i> peroxidase BP 1 (Prx5) mRNA, complete cds (1.0E-101).                                           |                                                                                                   |

|                |    |                                                                                                |  |
|----------------|----|------------------------------------------------------------------------------------------------|--|
| AK069456       | 8  | <i>Asparagus officinalis</i> mRNA for peroxidase (prx3 gene) (1.0E-125).                       |  |
| AK065893       | 7  | <i>A. thaliana</i> At4g32320 mRNA for putative L-ascorbate peroxidase, complete cds (1.0E-85). |  |
| AK065090       | 7  | <i>Z. mays</i> mRNA for anionic peroxidase (4.0E-71).                                          |  |
| AK070715       | 5  | <i>Triticum monococcum</i> peroxidase 8 (POX8) mRNA, complete cds (1.0E-120).                  |  |
| AK067667       | 5  | <i>Z. mays</i> mRNA for anionic peroxidase (9.0E-73).                                          |  |
| AK067416       | 4  | <i>Z. mays</i> partial mRNA for peroxidase (pox3 gene) (1.0E-123).                             |  |
| AK058883       | 4  | <i>Z. mays</i> mRNA for peroxidase (pox1 gene) (4.0E-84).                                      |  |
| AK104633       | 3  | <i>Ipomoea batatas</i> mRNA for peroxidase (pod gene) (7.0E-94).                               |  |
| AK106200       | 3  | <i>Spinacia oleracea</i> peroxidase prx12 precursor, mRNA, complete cds (3.0E-72).             |  |
| AK103558       | 3  | <i>Z. mays</i> mRNA for anionic peroxidase (1.0E-79).                                          |  |
| AK109551       | 3  | <i>Nicotiana tabacum</i> mRNA for cationic peroxidase isozyme 40K, complete cds (2.0E-70).     |  |
| AK073202       | 3  | <i>O. sativa</i> peroxidase (POX22.3) mRNA, complete cds (0.0).                                |  |
| AK060007       | 3  | <i>S. oleracea</i> mRNA for peroxidase, clone PC55 (3.0E-92).                                  |  |
| AK101508       | -3 | <i>Nicotiana tabacum</i> mRNA for cationic peroxidase isozyme 40K, complete cds (1.0E-72).     |  |
| AK069281       | -3 | <i>Triticum monococcum</i> peroxidase 7 (POX7) mRNA, complete cds (0.0).                       |  |
| <b>Kinases</b> |    |                                                                                                |  |
| AK105196       | 96 | <i>Z. mays</i> NPK1-related protein kinase-like protein (mapkkk1) mRNA, partial cds (7.0E-72). |  |
| AK109702       | 86 | <i>Z. mays</i> NPK1-related protein kinase-like protein (mapkkk1) mRNA, partial cds (1.0E-62). |  |



|          |    |                                                                                                          |  |
|----------|----|----------------------------------------------------------------------------------------------------------|--|
| AK071585 | 77 | NPK1-related protein kinase homolog T26B15.7 - <i>A. thaliana</i> (1.0E-58).                             |  |
| AK107168 | 44 | <i>Z. mays</i> NPK1-related protein kinase-like protein (mapkkk1) mRNA, partial cds (3.0E-93).           |  |
| AK111977 | 35 | <i>Z. mays</i> Avr9/Cf-9 induced kinase 1 (ACIK1) mRNA, complete cds (1.0E-124).                         |  |
| AK058518 | 29 | NPK1-related protein kinase homolog F10M23.230 - <i>A. thaliana</i> (6.0E-64).                           |  |
| AK105946 | 26 | <i>Z. mays</i> NPK1-related protein kinase-like protein (mapkkk1) mRNA, partial cds (2.0E-70).           |  |
| AK107566 | 12 | <i>O. sativa</i> (japonica-group) clone OsJalk8 putative leucine-rich repeat receptor-like kinase (0.0). |  |
| AK099582 | 13 | wall-associated serine/threonine kinase (EC 2.7.1.-) 2 [imported] - <i>A. thaliana</i> (6.0E-89).        |  |
| AK100906 | 10 | probable diacylglycerol kinase [imported] - <i>A. thaliana</i> (0.0).                                    |  |
| AK102590 | 10 | <i>Lycopersicon esculentum</i> diacylglycerol kinase (DGK1) mRNA, complete cds (0.0).                    |  |
| AK072014 | 8  | <i>A. thaliana</i> WNK3 mRNA for protein kinase, complete cds (1.0E-63).                                 |  |
| AK069094 | 8  | <i>A. thaliana</i> protein kinase-like protein (At3g25840) mRNA, complete cds (5.0E-94).                 |  |
| AK068330 | 6  | <i>Nicotiana tabacum</i> Avr9/Cf-9 induced kinase 1 (ACIK1) mRNA, complete cds (1.0E-133).               |  |
| AK105337 | 6  | <i>A. thaliana</i> At5g47070 mRNA for putative serine /threonine kinase, clone: RAFL17-20-O04 (2.0E-95). |  |
| AK106447 | 6  | receptor-protein kinase-like protein - <i>A. thaliana</i> (2.0E-98).                                     |  |
| AK069157 | 6  | <i>O. sativa</i> subsp. indica pyruvate dehydrogenase kinase 1 mRNA, complete cds (0.0).                 |  |
| AK110253 | 6  | <i>Z. mays</i> mRNA for putative protein kinase (0.0).                                                   |  |
| AK109607 | 6  | <i>A. thaliana</i> putative protein kinase (At2g05940) mRNA, complete cds (1.0E-119).                    |  |
| AK100357 | 6  | <i>A. thaliana</i> putative casein kinase (At3g13670) mRNA, complete cds (0.0).                          |  |

|          |   |                                                                                                                |  |
|----------|---|----------------------------------------------------------------------------------------------------------------|--|
| AK100082 | 5 | <i>A. thaliana</i> putative receptor protein kinase (At1g28440) mRNA, complete cds (0.0).                      |  |
| AK068025 | 5 | <i>O. sativa</i> (japonica cultivar-group) mRNA for orthophosphate dikinase, complete cds (0.0).               |  |
| AK102758 | 5 | <i>Z. mays</i> KI domain interacting kinase 1 (KIK1) mRNA, complete cds (0.0).                                 |  |
| AK072243 | 5 | <i>O. sativa</i> fructose-6-phosphate-2-kinase/fructose-2,6-bisphosphatase mRNA, complete cds (0.0).           |  |
| AK106421 | 4 | <i>A. thaliana</i> Columbia protein kinase mRNA, complete cds (7.0E-97).                                       |  |
| AK100389 | 4 | <i>O. sativa</i> (japonica cultivar-group) MAPK6 mRNA, complete cds (0.0).                                     |  |
| AK066978 | 4 | <i>Lycopersicon esculentum</i> auxin-regulated dual specificity cytosolic kinase mRNA, complete cds (2.0E-50). |  |
| AK061645 | 4 | <i>O. sativa</i> (japonica cultivar-group) MAPK6 mRNA, complete cds (0.0).                                     |  |
| AK108455 | 4 | <i>A. thaliana</i> putative protein kinase (At1g67580; F12B7.13) mRNA, complete cds (5.0E-40).                 |  |
| AK110482 | 3 | <i>A. thaliana</i> putative receptor serine/threonine kinase PR5K (PR5K) mRNA, complete cds (1.0E-93).         |  |
| AK071798 | 3 | <i>Prunus armeniaca</i> pyrophosphate-dependent phosphofructo-1-kinase mRNA, partial cds (1.0E-109).           |  |
| AK111550 | 3 | <i>A. thaliana</i> At4g23180 mRNA for putative receptor-like protein kinase 4 (RLK4), complete cds (1.0E-110). |  |
| AK105151 | 3 | <i>O. sativa</i> (indica cultivar-group) choline kinase (CK) mRNA, complete cds (0.0).                         |  |
| AK071968 | 3 | <i>O. sativa</i> (indica cultivar-group) choline kinase (CK) mRNA, complete cds (0.0).                         |  |
| AK103306 | 3 | <i>A. thaliana</i> calcium-dependent protein kinase (At3g51850) mRNA, complete cds (1.0E-162).                 |  |
| AK067266 | 3 | <i>A. thaliana</i> ATPK64 mRNA for protein kinase, complete cds (3.0E-47).                                     |  |
| AK109954 | 3 | <i>Nicotiana tabacum</i> cytokinin-regulated kinase 1 (CRK1) mRNA, complete cds (4.0E-78).                     |  |

|                   |    |                                                                                                                     |  |
|-------------------|----|---------------------------------------------------------------------------------------------------------------------|--|
| AK101080          | 3  | <i>Z. mays</i> phosphoenolpyruvate carboxylase kinase 1 (PPCK1) mRNA, complete cds (1.0E-149).                      |  |
| AK111842          | 3  | leucine-rich repeat transmembrane protein kinase 1 - <i>Z. mays</i> (fragment) (1.0E-170).                          |  |
| AK061220          | 3  | serine/threonine protein kinase-like protein - <i>A. thaliana</i> (1.0E-138).                                       |  |
| AK065374          | 3  | <i>A. thaliana</i> SOS2-like protein kinase PKS8 mRNA, complete cds (1.0E-121).                                     |  |
| AK064359          | -3 | <i>A. thaliana</i> putative receptor protein kinase (At5g53890) mRNA, complete cds (0.0).                           |  |
| AK067238          | -3 | <i>A. thaliana</i> clone RAFL15-23-F05 (R20566) putative cell division-related protein (At1g53050) mRNA (1.0E-162). |  |
| AK067723          | -3 | <i>A. thaliana</i> putative receptor protein kinase (At1g28440) mRNA, complete cds (0.0).                           |  |
| AK103166          | -4 | <i>A. thaliana</i> putative receptor protein kinase (At5g53890) mRNA, complete cds (0.0).                           |  |
| AK073574          | -5 | <i>Saccharum</i> hybrid cultivar SP70-1143 SHR5-receptor-like kinase mRNA, partial cds (1.0E-142).                  |  |
| <b>Chitinases</b> |    |                                                                                                                     |  |
| AK059767          | 20 | <i>Tulipa bakeri</i> tbc1 mRNA for bulb chitinase-1, complete cds (1.0E-74).                                        |  |
| AK071453          | 11 | <i>O. sativa</i> (japonica cultivar-group) class III chitinase RCB4 (Rcb4) mRNA, complete cds (1.0E-150).           |  |
| AK100973          | 9  | <i>O. sativa</i> (japonica cultivar-group) mRNA for acidic class III chitinase OsChib3a, complete cds (0.0).        |  |
| AK102505          | 7  | <i>O. sativa</i> (japonica cultivar-group) mRNA for chitinase, complete cds (8.0E-69).                              |  |
| AK108949          | 5  | <i>O. sativa</i> mRNA for endochitinase (0.0).                                                                      |  |
| AK073843          | 4  | <i>O. sativa</i> (japonica cultivar-group) mRNA for chitinase, complete cds (2.0E-87).                              |  |
| AK064180          | 3  | <i>O. sativa</i> (japonica cultivar-group) mRNA for chitinase, complete cds (2.0E-58).                              |  |

|                            |                  |                                                                                                                     |  |
|----------------------------|------------------|---------------------------------------------------------------------------------------------------------------------|--|
| AK061042                   | 3                | <i>O. sativa</i> mRNA for endochitinase (0.0).                                                                      |  |
| <b>Membrane Proteins</b>   |                  |                                                                                                                     |  |
| AK06487                    | 59<br>(5.4E-19)  | <i>A. thaliana</i> At2g46890 mRNA for unknown protein, clone: RAFL17-06-H20 (1E-100).                               |  |
| AK107700                   | 26<br>(0)        | <i>Z. mays</i> plasma membrane integral protein ZmPIP2-6 mRNA, complete cds (1.0E-127).                             |  |
| AK072632                   | 6                | <i>Z. mays</i> plasma membrane integral protein ZmPIP2-6 mRNA, complete cds (0.0).                                  |  |
| AK061898                   | 5                | <i>O. sativa</i> (japonica cultivar-group) mRNA for membrane related protein (mrp1 gene) (0.0).                     |  |
| AK065035                   | 5                | <i>O. sativa</i> (japonica cultivar-group) mRNA for membrane related protein (mrp1 gene) (0.0).                     |  |
| AK061782                   | 5                | <i>Triticum aestivum</i> plasma membrane intrinsic protein 2 (PIP2) mRNA, complete cds (0.0).                       |  |
| AK102174                   | 4                | <i>Z. mays</i> plasma membrane integral protein ZmPIP1-5 mRNA, complete cds (0.0).                                  |  |
| AK058648                   | 4                | <i>Saccharum</i> hybrid cultivar H65-7052 membrane protein mRNA, complete cds (2.0E-80).                            |  |
| AK102748                   | 3                | <i>Gossypium hirsutum</i> membrane-anchored endo-1,4-beta-glucanase (CEL) mRNA, complete cds (0.0).                 |  |
| AK066134                   | 3                | (O49621) MLO-like protein 1 (AtMlo1) (MLO protein homolog 1) (AtMLO-H1) (1.0E-101).                                 |  |
| AK107345                   | -43<br>(8.8E-10) | <i>A. thaliana</i> integral membrane protein, putative (At3g21690) mRNA, complete cds (1.0E-126).                   |  |
| <b>Heat Shock proteins</b> |                  |                                                                                                                     |  |
| AK100412                   | 5                | <i>O. sativa</i> (japonica cultivar-group) Spl7 mRNA for heat stress transcription factor Spl7, complete cds (0.0). |  |
| AK064271                   | 5                | <i>A. thaliana</i> At2g26150 mRNA for putative heat shock transcription factor, complete cds (5.0E-54).             |  |
| AK101934                   | 4                | <i>Lycopersicon peruvianum</i> heat stress transcription factor A3 (HSFA3) mRNA, complete cds (1.0E-68).            |  |

|                                 |                 |                                                                                                           |  |
|---------------------------------|-----------------|-----------------------------------------------------------------------------------------------------------|--|
| AK101824                        | 4               | <i>O. sativa</i> (japonica cultivar-group) heat shock factor RHSF5 mRNA, complete cds (0.0).              |  |
| AK066844                        | 3               | <i>O. sativa</i> (japonica cultivar-group) heat shock factor RHSF7 mRNA, complete cds (1.0E-149).         |  |
| AK062091                        | 3               | <i>Fragaria x ananassa</i> LMW heat shock protein mRNA, complete cds (2.0E-24).                           |  |
|                                 |                 |                                                                                                           |  |
|                                 |                 |                                                                                                           |  |
| <b>Glucanases</b>               |                 |                                                                                                           |  |
| AK063953                        | 32<br>(0)       | <i>O. sativa</i> endo-1,3-beta-glucanase mRNA, complete cds (0.0).                                        |  |
| AK058891                        | 4               | Sorghum bicolor beta-1,3-glucanase mRNA, partial cds (5.0E-89).                                           |  |
| AK069096                        | 3<br>(3.9E-29)  | <i>O. sativa</i> endo-1,3-beta-glucanase mRNA, complete cds (0.0).                                        |  |
| AK104139                        | -4<br>(0)       | <i>O. sativa</i> endo-1,3-beta-glucanase mRNA, complete cds (0.0).                                        |  |
| AK103072                        | -4<br>(3.9E-33) | <i>A. thaliana</i> putative beta-1,3-glucanase (At2g27500) mRNA, complete cds (1.0E-122).                 |  |
| <b>Pectin-Degrading Enzymes</b> |                 |                                                                                                           |  |
| AK073853                        | 4               | <i>A. thaliana</i> putative polygalacturonase (At1g60590/F8A5_12) mRNA, complete cds (1.0E-139).          |  |
| AK100257                        | -3              | <i>Z. mays</i> mRNA for pectin methylesterase-like protein (1.0E-126).                                    |  |
| AK105858                        | -4              | <i>Lycopersicon esculentum</i> polygalacturonase (XOPG1) mRNA, complete cds (1.0E-112).                   |  |
| AK106049                        | -4              | <i>Lycopersicon esculentum</i> polygalacturonase (XOPG1) mRNA, complete cds (1.0E-108).                   |  |
| AK101962                        | -5              | <i>A. thaliana</i> clone U11512 putative pectin methylesterase (At5g09760) mRNA, complete cds (1.0E-135). |  |

|                                     |    |                                                                                      |                                                                                                 |
|-------------------------------------|----|--------------------------------------------------------------------------------------|-------------------------------------------------------------------------------------------------|
| <b>Phenylalanine Ammonia Lyases</b> |    |                                                                                      | <i>Note that the 4 additional PAL genes were not differentially regulated in this category.</i> |
| AK068993                            | 5  | <i>Bambusa oldhamii</i> phenylalanine ammonia-lyase (PAL1) mRNA, complete cds (0.0). |                                                                                                 |
| AK067801                            | 5  | <i>Bambusa oldhamii</i> phenylalanine ammonia-lyase (PAL1) mRNA, complete cds (0.0). |                                                                                                 |
| <b>Expansins</b>                    |    |                                                                                      |                                                                                                 |
| AK060313                            | 3  | <i>O. sativa</i> expansin Os-EXP3 (Os-EXP3) mRNA, complete cds (0.0).                |                                                                                                 |
| AK064012                            | 3  | <i>O. sativa</i> beta-expansin (EXPB4) mRNA, complete cds. PLN                       |                                                                                                 |
| AK062225                            | -3 | <i>O. sativa</i> alpha-expansin OsEXP10 mRNA, complete cds (0.0).                    |                                                                                                 |
| AK061068                            | -5 | <i>O. sativa</i> beta-expansin (EXPB2) mRNA, complete cds (1.0E-155).                |                                                                                                 |
| AK100959                            | -9 | <i>O. sativa</i> beta-expansin (EXPB3) mRNA, complete cds (0.0).                     |                                                                                                 |

**SUPPLEMENTAL TABLE 3. Comparison of rice gene expression in our study with expression during wounding in the study of Katou et al. (2007).**

| Gene     | Putative Function                                                                                 | Expression during biotrophic invasion | Expression 24 hr after wounding <sup>a</sup> |
|----------|---------------------------------------------------------------------------------------------------|---------------------------------------|----------------------------------------------|
| AK060800 | <i>O. sativa</i> chlorophyll a/b-binding protein precursor                                        | -29.                                  | 6                                            |
| AK063251 | Unknown expressed protein                                                                         | -3                                    | 3                                            |
| AK064485 | <i>A. thaliana</i> At5g41080, unknown protein                                                     | 21                                    | 1                                            |
| AK065358 | <i>Gossypium hirsutum</i> dehydration-induced protein RD22-like protein (RDL)                     | -3                                    | 1                                            |
| AK069119 | Unknown expressed protein                                                                         | 6                                     | 0                                            |
| AK069313 | <i>A. thaliana</i> clone 40186 mRNA                                                               | 3                                     | 2                                            |
| AK070656 | <i>O. sativa</i> (indica cultivar-group) osnas3, nicotianamine synthase 3                         | -2                                    | 0                                            |
| AK070684 | <i>A. thaliana</i> putative purple acid phosphatase (At1g14700)                                   | -3                                    | 1                                            |
| AK099574 | <i>O. sativa</i> (japonica cultivar-group) small subunit of ribulose-1,5-bisphosphate carboxylase | 4                                     | 0                                            |
| AK100959 | <i>O. sativa</i> beta-expansin (EXPB3) mRNA                                                       | -9                                    | 2                                            |
| AK105666 | <i>Nicotiana tabacum</i> , CND41, chloroplast nucleoid DNA binding protein                        | -6                                    | 2                                            |
| AK106493 | Unknown expressed protein                                                                         | 4                                     | 3                                            |
| AK107926 | <i>Triticum aestivum</i> pathogenesis-related protein 1                                           | -2                                    | 7                                            |

<sup>a</sup>Data from Katou et al. (2007), also using the Agilent rice array. They analyzed cut leaf tissue. Additionally, a mitogen-activated protein kinase phosphatase OsMKP1 (AK105748) that was highly induced by wounding showed no change in expression levels in our infected tissue.

**Supplemental Table 4. Primers used in this study**

| <b>Primer Name</b>                                   | <b>Sequence 5'-3'</b>                            | <b>Description</b>                                                        |
|------------------------------------------------------|--------------------------------------------------|---------------------------------------------------------------------------|
| <b>Fungal primers for gene knock-out cassette</b>    |                                                  |                                                                           |
| AMG08541-5'F                                         | CGGAATTCTAGATCATGGGCGGTTGTC                      | 1-kb 5'-flanking region of MGG_09693.6                                    |
| AMG08541-5'R                                         | TTGACCTCCACTAGCTCCAGCCAAGCCGT TAGTGGAACGTCACCATC |                                                                           |
| AMG08541-3'F                                         | GAATAGAGTAGATGCCGACCGCGGGTTGA CTAGTTCTAGGTCTGGTG | 1-kb 3'-flanking region of MGG_09693.6                                    |
| AMG08541-3'R                                         | GCTCTAGAGTGGTTGTACACAATGGCG                      |                                                                           |
| AMG12560-5'F                                         | GGCAAGCTTCGATTTGGCGACTGGTGTA                     | 1-kb 5'-flanking region of MGG_11610.6                                    |
| AMG12560-5'R                                         | TTGACCTCCACTAGCTCCAGCCAAGCCAC TGCATCTTGATGGTTGGG |                                                                           |
| AMG12560-3'F                                         | GAATAGAGTAGATGCCGACCGCGGGTTCA TCGCTAGTGTGGCTCTC  | 1-kb 3'-flanking region of MGG_11610.6                                    |
| AMG12560-3'R                                         | GGCCCCGGGGCTGTATTGATCGAGCCGAG                    |                                                                           |
| AMG08261-5'F                                         | CGGAATTCTGCGACAATACCATAACGCC                     | 1-kb 5'-flanking region of MGG_04795.6                                    |
| AMG08261-5'R                                         | TTGACCTCCACTAGCTCCAGCCAAGCCTG TGTTAGAACCTTGGTCGG |                                                                           |
| AMG08261-3'F                                         | GAATAGAGTAGATGCCGACCGCGGGTTAT CGGCTTGGTCGATTACGG | 1-kb 3'-flanking region of MGG_04795.6                                    |
| AMG08261-3'R                                         | GCTCTAGAGTCGCGTCAGTGAACCTAACC                    |                                                                           |
| HYG-1F                                               | GGCTTGGCTGGAGCTAGTGGAGG                          | 1.4-kb hygromycin gene                                                    |
| HYG-2R                                               | AACCCGCGGTCGGCATCTACTCTA                         |                                                                           |
| <b>Fungal primers for fluorescent protein fusion</b> |                                                  |                                                                           |
| AMG08261-SP2-F                                       | CCGGAATTCACAGAATAAGACACGGCAAG ATTTA              | 1.3-kb MGG_04795.6 promoter plus entire coding sequence                   |
| AMG08261-SP2-R                                       | CGCGGATCCCGGTAATAATTCTCCACCC GTCTA               |                                                                           |
| AMG08261-SP2-R2                                      | GGATCCTTTAGGAATAATTGGTAAAGAT                     | 1.0-kb MGG_04795.6 promoter sequence; used with the primer AMG08261-SP2-F |
| AMG08541-SP3-F                                       | CCGGAATTCGAAAGCTCGACTCCCGAGG AGCTG               | 1.4-kb MGG_09693.6 promoter plus entire coding sequence                   |
| AMG08541-SP3-R                                       | CGCGGATCCGAAACCCTGCTTCTTGACCT GCTCC              |                                                                           |
| AMG12560-SP4-F                                       | CCGGAATTCGCAGAGTGTCATCCGATAAT CACAT              | 1.5-kb MGG_11610.6 promoter plus entire coding sequence                   |
| AMG12560-SP4-R                                       | CGCGGATCCGTGGGCACTGTTGGCAGCGC CGTTC              |                                                                           |
| AMG12560-SP4-R2                                      | GGATCCCTTGATGGTTGGGTTTTGG                        | 1.0-kb MGG_11610.6                                                        |



|                                  |                                           |                                                                             |
|----------------------------------|-------------------------------------------|-----------------------------------------------------------------------------|
|                                  |                                           | promoter                                                                    |
| AMG15980-SP5-F                   | CCGGAATTCGGTAGCTTCTACGGATGCGT<br>CCGAT    | 1.5-kb MGG_10914.6<br>promoter plus entire<br>coding sequence               |
| AMG15980-SP5-R                   | CGCGGATCCAGCAGGGGGGATAGACGAGC<br>CAGTA    |                                                                             |
| FBamYFP                          | CGCGGATCCGCGATGGTGAGCAAGGGCGA<br>GGAGCTGT | 1.0-kb EYFP and<br><i>Neurospora crassa</i> $\beta$ -<br>tubulin terminator |
| RHind3T                          | CCCAAGCTTGGGATCATCATGCAACATGC<br>ATGTACTG |                                                                             |
| CKP23_EcoRI-<br>RP27             | GAATTCGAATTGGGTACTCAAATTGG                | 0.5-kb <i>M. oryzae</i><br>ribosomal protein 27<br>promoter                 |
| CKP16_RP27-<br>BamHI-atgg        | CCATGGATCCTTTGAAGATTGGGTTCCTA<br>C        |                                                                             |
| CKP17_EGFP-PstI                  | CTGCAGGTGTGAGCAAGGGCGAGGAG                | 1.0-kb EGFP and<br><i>Neurospora crassa</i> $\beta$ -<br>tubulin terminator |
| CKP18_RB-p2                      | GGGCCTCTTCGCTATTAC                        |                                                                             |
| CKP35_mRFP-Bam                   | GGATCCGCCTCCTCCGAGGACGTC                  | mRFP reporter gene                                                          |
| CKP36_mRFP-Sph                   | GCATGCTTAGGCGCCGGTGGAGTG                  |                                                                             |
| CKP110_SP5P-F                    | GAATTCGGTAGCTTCTACGGATGC                  | MGG_10914.6<br>( <i>BAS4</i> ) promoter                                     |
| CKP111_SP5P-R                    | GGATCCTGTGAAAAGATTCGTTGTG                 |                                                                             |
| CKP104_SP5SP-F                   | GGATCCATGCAGCTCTCATTCTC                   | MGG_10914.6<br>( <i>BAS4</i> ) sequence for<br>signal peptide               |
| CKP105_SP5SP-R                   | CTGCAGGGTGCAGATCGGCCGTAG                  |                                                                             |
| AVR-Pita1-P1                     | CGGAATTCGCCGAGTCGTTCTGA                   | <i>AVR-Pita1</i> promoter<br>plus the sequence for<br>signal peptide        |
| AVR-Pita1-S1                     | GGGATCCAATGTTGGTGAAGGCC                   |                                                                             |
| <b>Fungal primers for RT-PCR</b> |                                           |                                                                             |
| AMG15373-3-F                     | CGCCGTCTACGCCATCCTGG                      |                                                                             |
| AMG15373-4-R                     | CCGCCTGGTGATGACGTCGG                      |                                                                             |
| AMG08263-F                       | AAATCAATCAAACGCGGGACTGGC                  |                                                                             |
| AMG08263-R                       | ACATGGCGTCCTCATCATCGGAAT                  |                                                                             |
| AMG08261-F                       | TTTACGGTGCTTGCCACCTTTACC                  |                                                                             |
| AMG08261-R                       | GCCTTCCATTGCTCGAATCTGCTT                  |                                                                             |
| AMG08541-F                       | AAGAACGTCGGCACAGGTAACGG                   |                                                                             |
| AMG08541-R                       | CTTAACGGTCTGGGCCTTGTTGG                   |                                                                             |
| AMG06765-F                       | GAAGGCGACCGTGCTTGCAATTT                   |                                                                             |
| AMG06765-R                       | TTGCATCCCCTCTCCTTCAGAGCAA                 |                                                                             |
| AMG06650-F                       | GCAGCTCCACAACGTCTGTTCAAT                  |                                                                             |
| AMG06650-R                       | AGTCACAGTAGCCGCACGAGTATT                  |                                                                             |
| AMG12560-F                       | AGACTTCCCCGGTGCCAAAGC                     |                                                                             |
| AMG12560-R                       | AGATGCAGGGGTTGTCCCCG                      |                                                                             |
| AMG13016-F                       | TTTCGCTACTGTTGCCACCTTGG                   |                                                                             |
| AMG13016-R                       | TTAGTTAAGCTGGGTACCCTCCGC                  |                                                                             |
| AMG05292-F                       | AGCACCTCGACCAAAGTCAAGCTA                  |                                                                             |

|                                |                            |          |
|--------------------------------|----------------------------|----------|
| AMG05292-R                     | TGGCAAGTGTAGCCGTTGATAAGC   |          |
| AMG13014-F                     | GGACAACTTTACGCCGCTCAACAA   |          |
| AMG13014-R                     | TATCATCCCTCAACCAGCCCAACA   |          |
| AMG08701-F                     | CCGTGGGCTACGGCTATGAAATTA   |          |
| AMG08701-R                     | ATGGAACCTGCATGTGACGCGTAT   |          |
| AMG15980-F                     | AGCTCTCATTCTCAGCAATCGCCA   |          |
| AMG15980-R                     | TCATTTCCGTCCAGAGACTTGGCA   |          |
| AMG08508-F                     | TGTTACCATGTTTCGCCGTTGGT    |          |
| AMG08508-R                     | CATAGTCCGAGAACTTTGCTTGGC   |          |
| AMG08160-2-F                   | ATGTCACTCGTTAACCTCTCCAGG   |          |
| AMG08160-3-R                   | AACGAGATGAAGTTGGCCGTGT     |          |
| AMG05133-F                     | TGGCATCCGACAGAACTACACCAA   |          |
| AMG05133-R                     | TCAAGCGAGAACTTCCAGTGCGTA   |          |
| AMG08859-F                     | GCGATGTTACCTGACCTGGG       |          |
| AMG08859-R                     | AGCCGTA CTGTAGCTGGTGCG     |          |
| AMG08417.2-F                   | AAAGATCCTGCACTCGCTCATCGT   |          |
| AMG08417.2-R                   | ACCTGGTCCCAATACTCAGTGCAA   |          |
| AMG16082-F                     | CGCAAGCAGTTCCATCGAAGCTTTAC |          |
| AMG16082-R                     | ATTGCTCCACTTCTTCGAATCGGG   |          |
| AMG15020-F                     | TGACCAATGGCAACAAGCGCGA     |          |
| AMG15020-R                     | TCTTGGAGCCAGTCTTGGTGCTA    |          |
| PWL2-F                         | GTGGCGGGTGGACTAACAAACAAT   |          |
| PWL2-R                         | AAACTCGCCTGGCGGTCCATAATA   |          |
| AVR-PITA-F                     | GCACCTTTTCACACCCAGTT       |          |
| AVR-PITA-R                     | CTCGGACGCACGTATAAACA       |          |
| AMG12697.1-F                   | ATTTCCGACAATGCACAGCCGCTAC  |          |
| AMG12697.1-R                   | CATGTCGGCACCTTTGATGTTGCT   |          |
| AMG05260-F                     | AATCCGACTCTTTCAGTAGCGGCA   |          |
| AMG05260-R                     | CTCCATGCATTTGCCTTCGATGCT   |          |
| AMG06064-F                     | ATGACTTGCCTATGAGTGGGCA     |          |
| AMG06064-R                     | TATTTGTCGCCAAAGGTCTCCCGT   |          |
| AMG01994-F                     | CTTTGT CATGTCCAACAGCGGCAT  |          |
| AMG01944-R                     | CAAATGCACGGCAGAAACCCTCAA   |          |
| MgACTIN328-F                   | TCCCATGTCACCACTTTCAA       |          |
| MgACTIN328-R                   | TTCGAGATCCACATCTGCTG       |          |
| <b>Rice primers for RT-PCR</b> |                            |          |
| <b>RICE PRIMERS</b>            |                            |          |
| OsACTIN-F                      | GAAGATCACTGCCTTGCTCC       |          |
| OsACTIN-R                      | CGATAACAGCTCCTCTTGGC       |          |
| MOS41902-F                     | ATCTTGGCCGAGTGTGACGAGAT    | AK071227 |
| MOS41902-R                     | TCAAAGTTGTTTGCTCGCCGAAGG   |          |
| MOS04462-F                     | TACTGGAGCACCCATTTCTCGCAT   | AK105196 |
| MOS04462-R                     | TCCGAAACTTCAGATGGGTGCTT    |          |

|            |                           |          |
|------------|---------------------------|----------|
| MOS28016-F | ATTGGAATCAGACGATGGCTGGA   | AK109702 |
| MOS28016-R | TTGGCGGAGCTGTTTCATCCACAAA |          |
| MOS04461-F | AAGGACTTCCTGGATGGCTGCTT   | AK071585 |
| MOS04461-R | TGGAGGATTCGATCGCTTCTGCTT  |          |
| MOS45375-F | ACATGCCGCTCTGGAGCTACTAAT  | AK062422 |
| MOS45375-R | AGCTCTTTGGAGAGGAGAAGTAAA  |          |
| MOS19247-F | AGCATCAGGGTGATTCCCTTGTCA  | AK071546 |
| MOS19247-R | TCAATCAGGCCCTCATGGTCTTGT  |          |
| MOS03724-F | CAGTGGAGCTTGTTGCAAACCCTT  | AK100135 |
| MOS03724-R | TCACCACCTCGCTTCATCAGGAAA  |          |
| MOS52342-F | GCTTGCCTTCGTCAAGTTCTTGGT  | AK059060 |
| MOS52342-R | TCTCACTTCCACCTCTTCGCGTTT  |          |
| MOS56011-F | ATGAAGCTCAACCCTGCTGTGGAT  | AK061606 |
| MOS56011-R | AGGAAGCAGCAATACGGAGATGGA  |          |
| MOS52906-F | CGACCATCGGCAATTTTCATTCGGT | AK069082 |
| MOS52906-R | ACCGTTAAGCTGGTTGGTCCTGAA  |          |
| MOS00599-F | TGGAGCTCCTGGATGCTGGAAATA  | AK108785 |
| MOS00599-R | AGGAGCTGATGCACTTGGAGATGT  |          |
| AK107735-F | AGCAAGAAAGTTGCTGGCAAGGTC  |          |
| AK107735-R | TCAAATCTCAACCTGGGTCGTCGT  |          |

**Supplemental Table 5. Key Plasmids Used in This Study**

| Clone  | Description                                                                                                                                                                                                                                                                                                                                                                                                                                                                                                                                                                                                                                                             |
|--------|-------------------------------------------------------------------------------------------------------------------------------------------------------------------------------------------------------------------------------------------------------------------------------------------------------------------------------------------------------------------------------------------------------------------------------------------------------------------------------------------------------------------------------------------------------------------------------------------------------------------------------------------------------------------------|
| pBV14  | ECFP expression vector derived from pSM324 (Bourett et al., 2002). <i>Used in transformant KV9.</i>                                                                                                                                                                                                                                                                                                                                                                                                                                                                                                                                                                     |
| pBV138 | 3.4-kb <i>EcoRI-XbaI</i> fragment of knock-out cassette for gene MGG_04795.6 ( <i>BAS1</i> ) cloned in <i>EcoRI-XbaI</i> sites of binary vector pGKO2 (Khang et al., 2005). <i>Used in transformants KV34, KV35, KV36, and KV37.</i>                                                                                                                                                                                                                                                                                                                                                                                                                                    |
| pBV139 | 3.4-kb <i>EcoRI-XbaI</i> fragment of knock-out cassette for gene MGG_09693.6 ( <i>BAS2</i> ) cloned in <i>EcoRI-XbaI</i> sites of pGKO2. <i>Used in transformants KV54, KV55, and KV56.</i>                                                                                                                                                                                                                                                                                                                                                                                                                                                                             |
| pBV140 | 3.4-kb <i>HindIII-SmaI</i> fragment of knock-out cassette for gene MGG_11610.6 ( <i>BAS3</i> ) cloned in <i>EcoRI-XbaI</i> sites of pGKO2. <i>Used in transformants KV71, KV72, and KV73.</i>                                                                                                                                                                                                                                                                                                                                                                                                                                                                           |
| pBV176 | EGFP expression binary vector derived from pBHt2 (Mullins et al., 2001), containing unique <i>BamHI</i> and <i>PstI</i> sites located between <i>M. oryzae</i> ribosomal protein 27 promoter (P27) and EGFP. This clone consists of three modules, (1) P27 ( <i>EcoRI-PstI</i> fragment), (2) EGFP ( <i>PstI-SphI</i> fragment), and (3) <i>Neurospora crassa</i> $\beta$ -tubulin terminator ( <i>SphI-HindIII</i> fragment), which were cloned in <i>EcoRI-HindIII</i> sites of pBHt2. P27 was amplified by PCR from pBV11 (=pSM565; Bourett et al., 2002), and EGFP: <i>N. crassa</i> $\beta$ -tubulin terminator from pSK1810 (Seogchan Kang, unpublished results). |
| pBV181 | EYFP expression binary vector derived from pBHt2, containing unique <i>EcoRI</i> and <i>BamHI</i> sites located upstream of EYFP; 1.0-kb PCR product of EYFP and <i>N. crassa</i> $\beta$ -tubulin terminator was amplified from pBV13 (Berruyer et al., 2006), digested with <i>BamHI</i> and <i>HindIII</i> , and subsequently cloned in <i>BamHI</i> and <i>HindIII</i> sites of pBHt2.                                                                                                                                                                                                                                                                              |
| pBV192 | 0.7-kb PCR product of mRFP reporter gene (monomeric red fluorescence protein; Campbell et al., 2002) cloned in pGEM-T vector (Promega)                                                                                                                                                                                                                                                                                                                                                                                                                                                                                                                                  |
| pBV197 | 1.0-kb <i>EcoRI-BamHI</i> fragment of MGG_04795.6 ( <i>BAS1</i> ) promoter cloned in <i>EcoRI-BamHI</i> sites of pBV176 (Transcriptional fusion of the <i>BAS1</i> promoter to the EGFP reporter gene). <i>Used in transformant KV93.</i>                                                                                                                                                                                                                                                                                                                                                                                                                               |
| pBV227 | 1-kb <i>EcoRI-BamHI</i> fragment of MGG_11610.6 ( <i>BAS3</i> ) promoter cloned in <i>EcoRI-BamHI</i> sites of pBV176 (Transcriptional fusion of the <i>BAS3</i> promoter to the EGFP reporter gene). <i>Used in transformant KV94.</i>                                                                                                                                                                                                                                                                                                                                                                                                                                 |

|        |                                                                                                                                                                                                                                                                                                                                                                  |
|--------|------------------------------------------------------------------------------------------------------------------------------------------------------------------------------------------------------------------------------------------------------------------------------------------------------------------------------------------------------------------|
| pBV231 | 1.3-kb PCR product of MGG_04795.6 ( <i>BAS1</i> ) promoter plus entire coding sequence was amplified by PCR, digested with <i>EcoRI</i> and <i>BamHI</i> , and subsequently cloned in <i>EcoRI-BamHI</i> sites of pBV181 (C-terminal translational fusion of <i>BAS1</i> entire coding sequence to the EYFP reporter gene). <i>Used in transformant KV89.</i>    |
| pBV232 | 1.5-kb PCR product of MGG_11610.6 ( <i>BAS3</i> ) promoter plus entire coding sequence was amplified by PCR, digested with <i>EcoRI</i> and <i>BamHI</i> , and subsequently cloned in <i>EcoRI-BamHI</i> sites of pBV181 (C-terminal translational fusion of <i>BAS3</i> entire coding sequence to the EYFP reporter gene). <i>Used in transformant KV90.</i>    |
| pBV233 | 1.3-kb PCR product of MGG_10914.6 ( <i>BAS4</i> ) promoter plus entire coding sequence was amplified by PCR, digested with <i>EcoRI</i> and <i>BamHI</i> , and subsequently cloned in <i>EcoRI-BamHI</i> sites of pBV181 (C-terminal translational fusion of <i>BAS4</i> entire coding sequence to the EYFP reporter gene). <i>Used in transformant KV91.</i>    |
| pBV234 | 1.4-kb PCR product of MGG_09693.6 ( <i>BAS2</i> ) promoter plus entire coding sequence was amplified by PCR, digested with <i>EcoRI</i> and <i>BamHI</i> , and subsequently cloned in <i>EcoRI-BamHI</i> sites of pBV181 (C-terminal translational fusion of <i>BAS2</i> entire coding sequence to the EYFP reporter gene). <i>Used in transformant KV92.</i>    |
| pBV324 | 1.0-kb <i>EcoRI-BamHI</i> fragment of MGG_10914.6 ( <i>BAS4</i> ) promoter and 72-bp <i>BamHI-PstI</i> fragment of MGG_10914.6 ( <i>BAS4</i> ) sequence for signal peptide cloned in <i>EcoRI-PstI</i> sites of pBV176 (C-terminal translational fusion of <i>BAS4</i> sequence for signal peptide to the EGFP reporter gene). <i>Used in transformant KV97.</i> |
| pBV367 | mRFP expression binary vector derived from pBGt (Seogchan Kang, unpublished results), consisting of three modules of P27 ( <i>EcoRI-BamHI</i> fragment), mRFP ( <i>BamHI-SphI</i> fragment of pBV192), and <i>N. crassa</i> $\beta$ -tubulin terminator ( <i>SphI-HindIII</i> fragment) that were cloned in <i>EcoRI-HindIII</i> sites of pBGt                   |
| pBV377 | 1.4-kb <i>EcoRI-BamHI</i> fragment of <i>PWL2</i> promoter plus entire coding sequence of SK1885 (Seogchan Kang, unpublished results) cloned in <i>EcoRI-BamHI</i> sites of pBV367 (C-terminal translational fusion of <i>PWL2</i> entire coding sequence to the mRFP reporter gene). <i>Used in transformant KV98.</i>                                          |
| pBV440 | 1.3-kb <i>EcoRI-BamHI</i> fragment from pBV231 cloned in <i>EcoRI-BamHI</i> sites of pBV367 (C-terminal translational fusion of <i>BAS1</i> entire coding sequence to the mRFP reporter gene). <i>Used in transformants KV95 and KV96.</i>                                                                                                                       |

|         |                                                                                                                                                                                                                                                                                                                                                    |
|---------|----------------------------------------------------------------------------------------------------------------------------------------------------------------------------------------------------------------------------------------------------------------------------------------------------------------------------------------------------|
| pSK1743 | EGFP expression binary vector derived from pBHt2, consisting of three modules, (1) P27 ( <i>EcoRI-BamHI</i> fragment), (2) EGFP ( <i>BamHI-SphI</i> fragment), and (3) <i>N. crassa</i> $\beta$ -tubulin terminator ( <i>SphI-HindIII</i> fragment), which were cloned in <i>EcoRI-HindIII</i> sites of pBHt2 (Seogchan Kang, unpublished results) |
| pSK1877 | 0.5-kb PCR product of <i>AVR-Pita1</i> promoter plus the sequence for signal peptide in pGEM-T Easy vector (Promega)                                                                                                                                                                                                                               |
| pSK1880 | 0.5-kb <i>EcoRI-BamHI</i> fragment of pSK1877 cloned in <i>EcoRI-BamHI</i> sites of pSK1743 (C-terminal translational fusion of <i>AVR-Pita1</i> sequence for signal peptide to the EGFP reporter gene). <i>Used in transformant Ft080.</i>                                                                                                        |

**Supplemental Table 6. Fungal Transformants Used in This Study**

| Name | Used in:            | Description [background strain; plasmid used]                                                                                               |
|------|---------------------|---------------------------------------------------------------------------------------------------------------------------------------------|
| KV1  | Figure 1            | Transformant with constitutive, cytoplasmic expression of EYFP [O-137; pBV13] (Kankanala et al., 2007).                                     |
| KV9  |                     | Transformant with constitutive, cytoplasmic expression of ECFP [Guy11; pBV14]                                                               |
| KV34 |                     | MGG_04795.6 ( <i>BAS1</i> ) knock-out transformant [KV1; pBV138]                                                                            |
| KV35 |                     | MGG_04795.6 ( <i>BAS1</i> ) knock-out transformant [KV1; pBV138]                                                                            |
| KV36 |                     | MGG_04795.6 ( <i>BAS1</i> ) ectopic transformant [KV1; pBV138]                                                                              |
| KV37 |                     | MGG_04795.6 ( <i>BAS1</i> ) ectopic transformant [KV1; pBV138]                                                                              |
| KV54 | Sup.Fig.3<br>online | MGG_09693.6 ( <i>BAS2</i> ) knock-out transformant [KV1; pBV139]                                                                            |
| KV55 | Sup.Fig.3<br>online | MGG_09693.6 ( <i>BAS2</i> ) knock-out transformant [KV1; pBV139]                                                                            |
| KV56 | Sup.Fig.3<br>online | MGG_09693.6 ( <i>BAS2</i> ) ectopic transformant [KV1; pBV139]                                                                              |
| KV71 |                     | MGG_11610.6 ( <i>BAS3</i> ) knock-out transformant [KV1; pBV140]                                                                            |
| KV72 |                     | MGG_11610.6 ( <i>BAS3</i> ) knock-out transformant [KV1; pBV140]                                                                            |
| KV73 |                     | MGG_11610.6 ( <i>BAS3</i> ) ectopic transformant [KV1; pBV140]                                                                              |
| KV89 | Figure 3B           | Transformant containing a fusion of MGG_04795 ( <i>BAS1</i> ) promoter and entire coding sequence with EYFP reporter gene [CP987; pBV231]   |
| KV90 | Figure 3D           | Transformant containing a fusion of MGG_11610.6 ( <i>BAS3</i> ) promoter and entire coding sequence with EYFP reporter gene [CP987; pBV232] |
| KV91 | Figure 3E           | Transformant containing a fusion of MGG_10914.6 ( <i>BAS4</i> ) promoter and entire coding sequence with EYFP reporter gene [O-137; pBV233] |
| KV92 | Figure 3C           | Transformant containing a fusion of MGG_09693.6 ( <i>BAS2</i> ) promoter and entire coding sequence with EYFP reporter gene [O-137; pBV234] |

|       |               |                                                                                                                                                                                                                                                   |
|-------|---------------|---------------------------------------------------------------------------------------------------------------------------------------------------------------------------------------------------------------------------------------------------|
| KV93  | Figure 2B     | Transformant containing a fusion of MGG_04795 ( <i>BASI</i> ) promoter with EGFP reporter gene [Guy11; pBV197]                                                                                                                                    |
| KV94  | Figure 2C     | Transformant containing a fusion of MGG_11610.6 ( <i>BAS3</i> ) promoter with EGFP reporter gene [Guy11; pBV227]                                                                                                                                  |
| Ft080 |               | Transformant containing a fusion of <i>AVR-Pital</i> promoter and sequence for signal peptide with EGFP reporter gene [CP987; pSK1880]                                                                                                            |
| KV95  | Figure 4B     | Transformant containing both a fusion of <i>AVR-Pital</i> promoter and sequence for signal peptide with EGFP reporter gene, and a fusion of MGG_04795 ( <i>BASI</i> ) promoter and entire coding sequence with mRFP reporter gene [Ft080; pBV440] |
| KV96  | Figure 4A     | Transformant containing a constitutive, cytoplasmic ECFP reporter gene, and a fusion of MGG_04795 ( <i>BASI</i> ) promoter and entire coding sequence with mRFP reporter gene [KV9; pBV440]                                                       |
| KV97  |               | Transformant containing a fusion of MGG_10914.6 ( <i>BAS4</i> ) promoter and sequence for signal peptide with EGFP reporter gene [O-137; pBV324]                                                                                                  |
| KV98  | Figure 4C,D,E | Transformant containing both a fusion of MGG_10914.6 ( <i>BAS4</i> ) promoter and sequence for signal peptide with EGFP reporter gene, and a fusion of <i>PWL2</i> promoter and entire coding sequence with mRFP reporter gene [KV97; pBV377]     |
